# Supplementary material for: Zinc Favors Triple-Negative Breast Cancer’s Microenvironment Modulation and Cell Plasticity
Source: MDPI journal article supplement (doi:10.3390/ijms22179188), 2021-08-25
Supplement: s1 [file s1]

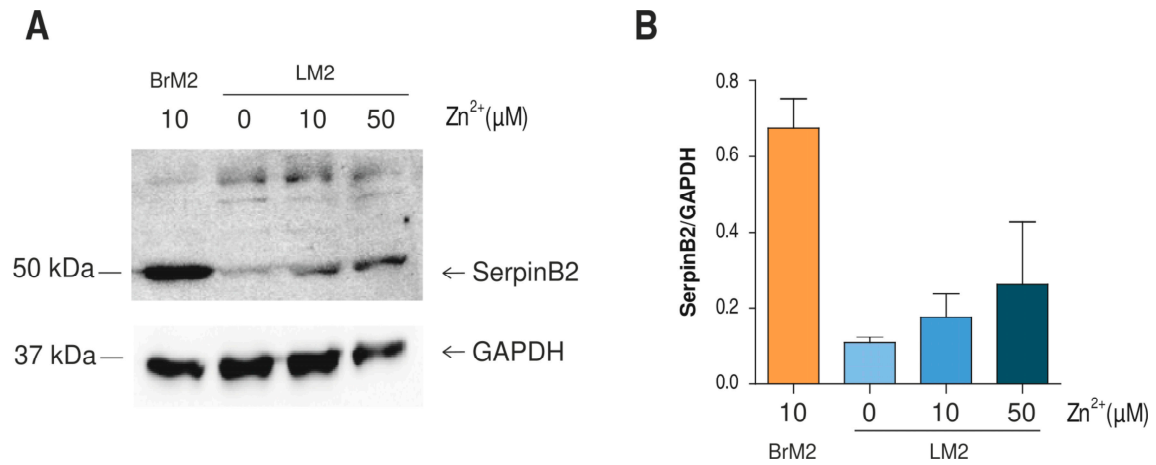

**Supplementary Figure S1.** SerpinB2 expression in MDA-MB-231-LM2 cells. **(A)** Representative Western blot against SerpinB2 and GAPDH in BrM2 and LM2 after 24 h of treatment with 0, 10, and 50 μM of ZnSO<sub>4</sub>. **(B)** Quantification of SerpinB2 protein expression normalized by GAPDH protein expression in BrM2 and LM2 cells after 24 h of treatment with 0, 10, and 50 μM of ZnSO<sub>4</sub> (n = 2).

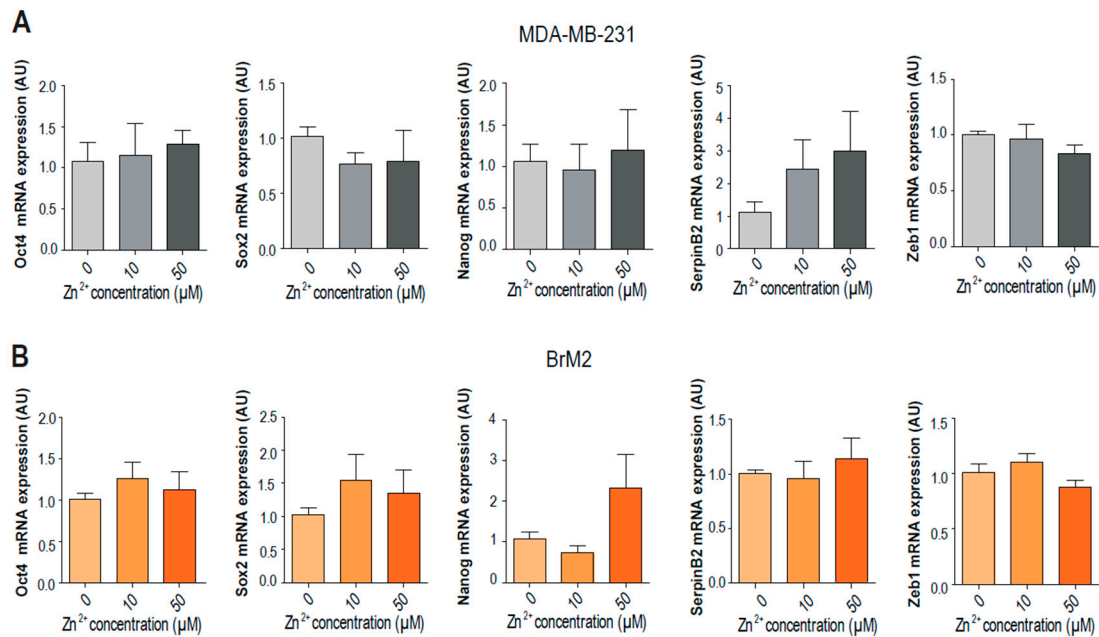

**Supplementary Figure S2.** RNA expression levels of stem-cell markers **(A)**. Real-Time RT PCRs comparing the MDA-MB-231 tumorspheres expression of Oct4, Sox2, Nanog, SerpinB2 and Zeb1 in 0, 10 and 50 μM of ZnSO<sub>4</sub>. 2<sup>-DDCT</sup> plotted using GAPDH as housekeeping gene and the 0 μM of ZnSO<sub>4</sub> condition as the control. (n = 4) **(B)** Real-Time RT PCRs comparing the BrM2 tumorspheres expression of Oct4, Sox2, Nanog, SerpinB2 and Zeb1 in 0, 10 and 50 μM of ZnSO<sub>4</sub>. 2<sup>-DDCT</sup> plotted using GAPDH as housekeeping gene and the 0 μM of ZnSO<sub>4</sub> condition as the control. (n = 3–8).

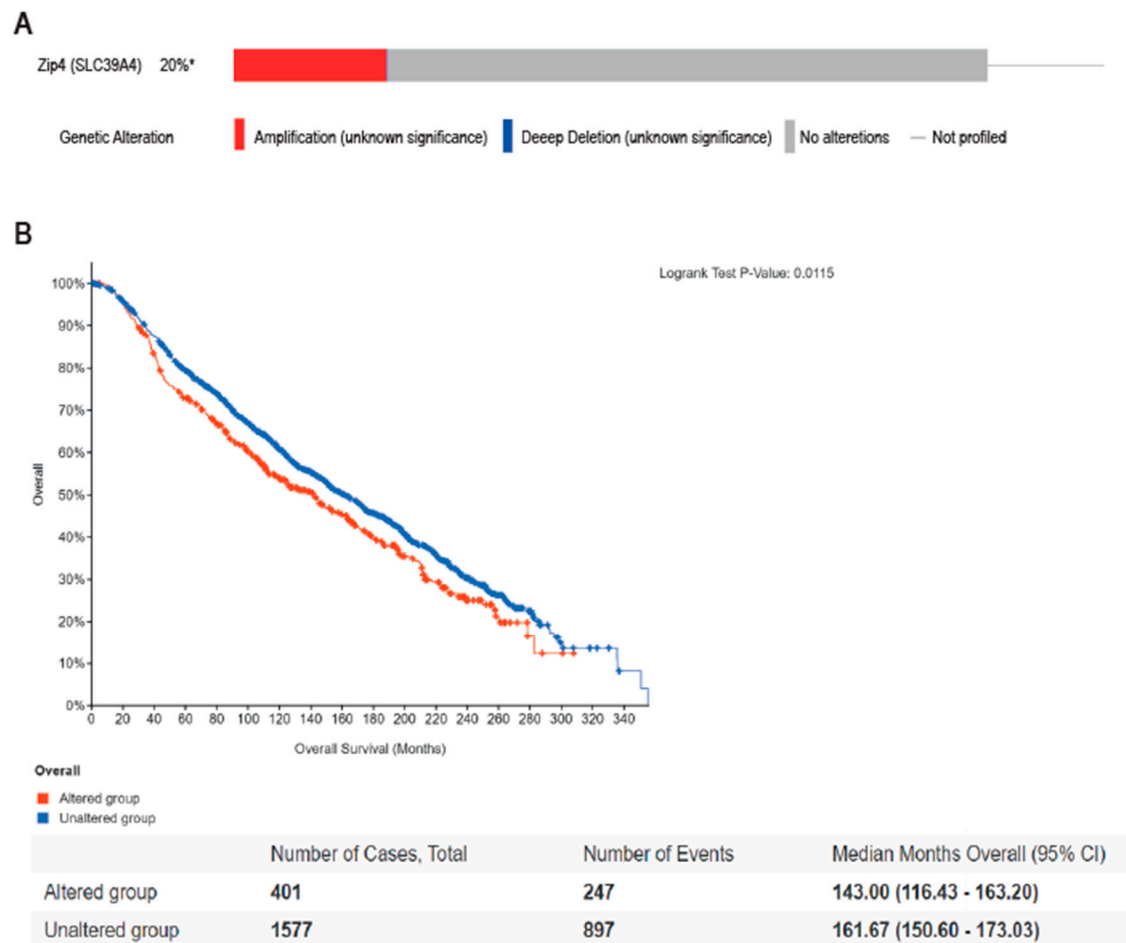

**Supplementary Figure S3.** Zip4 characterization in breast cancer patients. Extracted from cBioPortal for cancer genomics (METABRIC, Nature 2012 & Nat Commun 2016).
